# Supplementary material for: Discriminant Analysis of Main Prognostic Factors Associated with Hemodynamically Significant PDA: Apgar Score, Silverman–Anderson Score, and NT-Pro-BNP Level
Source: MDPI journal article supplement (doi:10.3390/jcm10163729), 2021-08-22
Supplement: s1 [file s1]

**Table S1.** Variables groups used for discriminant analysis

| Parameter group                                                            | Item                                                                                                                                                                                                                                                                                                                                                                                                                                                                                                                          |
|----------------------------------------------------------------------------|-------------------------------------------------------------------------------------------------------------------------------------------------------------------------------------------------------------------------------------------------------------------------------------------------------------------------------------------------------------------------------------------------------------------------------------------------------------------------------------------------------------------------------|
| Age and gender                                                             | <ul style="list-style-type: none"> <li>• Gender</li> <li>• Gestation age</li> </ul>                                                                                                                                                                                                                                                                                                                                                                                                                                           |
| Anthropometry                                                              | <ul style="list-style-type: none"> <li>• Weight</li> <li>• Height</li> </ul>                                                                                                                                                                                                                                                                                                                                                                                                                                                  |
| Clinical assessment of the cardiovascular and respiratory systems at birth | <ul style="list-style-type: none"> <li>• Apgar 1</li> <li>• Apgar 5</li> <li>• Apgar 10</li> <li>• Respiratory Severity Score</li> </ul>                                                                                                                                                                                                                                                                                                                                                                                      |
| Baby therapy after birth                                                   | <ul style="list-style-type: none"> <li>• Surfactant therapy (yes / no)</li> <li>• Inotrope therapy (yes / no)</li> </ul>                                                                                                                                                                                                                                                                                                                                                                                                      |
| Respiratory support type                                                   | <ul style="list-style-type: none"> <li>• DUOPAP (yes / no)</li> <li>• NCPAP (yes / no)</li> <li>• Mechanical ventilation (yes / no)</li> </ul>                                                                                                                                                                                                                                                                                                                                                                                |
| Laboratory data                                                            | <ul style="list-style-type: none"> <li>• NT-pro-BNP</li> <li>• Hemoglobin</li> <li>• Platelets</li> </ul>                                                                                                                                                                                                                                                                                                                                                                                                                     |
| ECHO-criteria                                                              | <ul style="list-style-type: none"> <li>• Diameter DA<math>\geq</math> 1.5 mm</li> <li>• LA/Ao<math>\geq</math> 1.4 – 2.0</li> <li>• Retrograde descending aortic flow <math>\geq</math> 50% of antegrade blood flow</li> </ul>                                                                                                                                                                                                                                                                                                |
| Data of instrumental research methods                                      | <ul style="list-style-type: none"> <li>• The presence of infiltrative shadows based on the results of radiography (yes/no)</li> </ul>                                                                                                                                                                                                                                                                                                                                                                                         |
| Maternal history                                                           | <ul style="list-style-type: none"> <li>• Mother's age</li> <li>• Chronic gynecological diseases</li> <li>• Endometriosis</li> <li>• Chronic adnexitis</li> </ul>                                                                                                                                                                                                                                                                                                                                                              |
| Obstetric history                                                          | <ul style="list-style-type: none"> <li>• Pregnancy parity</li> <li>• Birth parity</li> <li>• Operative labor (yes / no)</li> <li>• Number of medical abortions</li> <li>• Number of miscarriages</li> <li>• Medical supervision throughout pregnancy (yes / no)</li> <li>• Threat of miscarriage</li> <li>• Therapy during pregnancy (yes / no)</li> <li>• Presence of preeclampsia during present pregnancy</li> <li>• The presence of IVF in a real pregnancy</li> <li>• The state of the placenta in childbirth</li> </ul> |
| Somatic diseases of mother                                                 | <ul style="list-style-type: none"> <li>• Diseases of the genitourinary system (yes / no)</li> <li>• Diseases of the endocrine system (yes / no)</li> <li>• Diseases of the cardiovascular system, including arterial hypertension (yes / no)</li> <li>• Chronic nicotine intoxication (yes / no)</li> <li>• Chronic alcohol intoxication (yes / no)</li> </ul>                                                                                                                                                                |
